# Supplementary material for: Sleep Quality Disturbances Are Associated with White Matter Alterations in Veterans with Post-Traumatic Stress Disorder and Mild Traumatic Brain Injury
Source: J Clin Med. 2023 Mar 6;12(5):2079. doi: 10.3390/jcm12052079 (PMC10004675; doi:10.3390/jcm12052079)
Supplement: Supplementary file 1 [file jcm-12-02079-s001.zip › jcm-2259161-supplementary.pdf]

## Supplementary Tables

Supplementary Table S1. Sample characteristics: Group comparisons

|                                                |                                     | PTSD vs. mTBI vs.<br>Comorbid PTSD+mTBI vs.<br>No history of PTSD or mTBI | Post-hoc<br>PTSD vs.<br>mTBI | Post-hoc<br>PTSD vs.<br>Comorbid<br>PTSD+mTBI | Post-hoc<br>mTBI vs.<br>Comorbid<br>PTSD+mTBI | Post-hoc<br>PTSD vs.<br>No history of<br>PTSD or mTBI | Post-hoc<br>mTBI vs.<br>No history of<br>PTSD or mTBI | Post-hoc<br>Comorbid<br>PTSD+mTBI vs.<br>No history of<br>PTSD or mTBI |
|------------------------------------------------|-------------------------------------|---------------------------------------------------------------------------|------------------------------|-----------------------------------------------|-----------------------------------------------|-------------------------------------------------------|-------------------------------------------------------|------------------------------------------------------------------------|
|                                                |                                     | ANCOVA                                                                    |                              |                                               |                                               |                                                       |                                                       |                                                                        |
|                                                |                                     | <i>F(df), p</i>                                                           | <i>p</i>                     | <i>p</i>                                      | <i>p</i>                                      | <i>p</i>                                              | <i>p</i>                                              | <i>p</i>                                                               |
| Age (years)                                    |                                     | .25(3, 176), .859                                                         | .473                         | .979                                          | .425                                          | .735                                                  | .741                                                  | .717                                                                   |
| Education (years)                              |                                     | 2.07(3, 175), .106                                                        | .058                         | .171                                          | .311                                          | .029                                                  | .761                                                  | .175                                                                   |
| Number of OEF/OIF deployments                  |                                     | .09(3,175), .968                                                          | .920                         | .883                                          | .809                                          | .749                                                  | .839                                                  | .627                                                                   |
| Number of other stressful deployments          |                                     | 1.59(3, 175), .195                                                        | .387                         | .404                                          | .090                                          | .390                                                  | .990                                                  | .097                                                                   |
| Total duration of OEF/OIF deployments (months) |                                     | .03(3, 175), .995                                                         | .820                         | .819                                          | .948                                          | .946                                                  | .888                                                  | .911                                                                   |
| Total duration of other deployments (months)   |                                     | 1.30(3, 175), .275                                                        | .205                         | .742                                          | .084                                          | .397                                                  | .720                                                  | .218                                                                   |
| Number of lifetime mTBIs                       |                                     | 16.51(3, 175), <.001                                                      | -                            | -                                             | .123                                          | -                                                     | -                                                     | -                                                                      |
| Lifetime mTBI burden                           |                                     | 17.47(3,175), <.001                                                       | -                            | -                                             | .075                                          | -                                                     | -                                                     | -                                                                      |
| Total CAPS                                     |                                     | 47.40(3, 175), <.001                                                      | <.001                        | .001                                          | <.001                                         | <.001                                                 | .555                                                  | <.001                                                                  |
|                                                |                                     | Chi-square or Fisher's exact test                                         |                              |                                               |                                               |                                                       |                                                       |                                                                        |
|                                                |                                     | <i>χ<sup>2</sup>(df), p</i>                                               | <i>p</i>                     | <i>p</i>                                      | <i>p</i>                                      | <i>p</i>                                              | <i>p</i>                                              | <i>p</i>                                                               |
| Ethnicity                                      | American Indian or Alaska Native    | 2.04(3), 1.000                                                            | -                            | 1.000                                         | 1.000                                         | -                                                     | -                                                     | 1.000                                                                  |
|                                                | Asian                               | 1.69(3), .729                                                             | 1.000                        | .494                                          | 1.000                                         | 1.000                                                 | -                                                     | 1.000                                                                  |
|                                                | Black                               | 3.34(3), .318                                                             | 1.000                        | .373                                          | .395                                          | .287                                                  | .235                                                  | .596                                                                   |
|                                                | Hispanic or Latino                  | 1.36(3), .713                                                             | .741                         | .772                                          | .530                                          | .698                                                  | .419                                                  | .732                                                                   |
|                                                | Native Hawaiian or Pacific Islander | -                                                                         | -                            | -                                             | -                                             | -                                                     | -                                                     | -                                                                      |
|                                                | White                               | 5.71(3), .137                                                             | .972                         | .211                                          | .261                                          | .039                                                  | .075                                                  | .237                                                                   |
|                                                | Unknown                             | 3.85(3), .478                                                             | 1.000                        | .288                                          | -                                             | 1.000                                                 | -                                                     | -                                                                      |
| Service branch                                 | Army                                | 4.33(3), .226                                                             | .176                         | .117                                          | .860                                          | 1.000                                                 | .249                                                  | .240                                                                   |
|                                                | Army National Guard                 | 4.51(3), .212                                                             | .967                         | .184                                          | .233                                          | .523                                                  | .585                                                  | .062                                                                   |
|                                                | Air Force                           | 1.15(3), .844                                                             | .557                         | .673                                          | .637                                          | 1.000                                                 | 1.000                                                 | 1.000                                                                  |
|                                                | Air Force National Guard            | .99(3), .938                                                              | 1.000                        | .625                                          | 1.000                                         | 1.000                                                 | 1.000                                                 | 1.000                                                                  |
|                                                | Coast Guard                         | -                                                                         | -                            | -                                             | -                                             | -                                                     | -                                                     | -                                                                      |
|                                                | Navy                                | 1.06(3), .838                                                             | 1.000                        | .673                                          | 1.000                                         | 1.000                                                 | 1.000                                                 | .581                                                                   |
|                                                | Marines                             | 6.69(3), .080                                                             | 1.000                        | .059                                          | .198                                          | .700                                                  | .668                                                  | .046                                                                   |
| Psychiatric diagnoses                          | Reserves                            | 6.74(3), .070                                                             | .103                         | .013                                          | 1.000                                         | .422                                                  | .407                                                  | .282                                                                   |
|                                                | National Guard, branch unknown      | 5.44(3), .080                                                             | 1.000                        | 1.000                                         | 1.000                                         | .146                                                  | .102                                                  | .051                                                                   |
|                                                | Lifetime substance use disorder     | 12.50(3), .005                                                            | .503                         | .063                                          | .016                                          | .195                                                  | .555                                                  | .002                                                                   |
|                                                | Lifetime mood disorder              | 12.77(3), .005                                                            | .073                         | .409                                          | .009                                          | .045                                                  | 1.000                                                 | .005                                                                   |
|                                                | Lifetime anxiety disorder           | 1.81(3), 6.38                                                             | .334                         | .297                                          | .761                                          | .508                                                  | 1.000                                                 | 1.000                                                                  |
| mTBI                                           | Military mTBI                       | 60.09(3), <.001                                                           | -                            | -                                             | .004                                          | -                                                     | -                                                     | -                                                                      |

Note. SD, Standard deviation; PTSD, Post-traumatic stress disorder; mTBI, Mild traumatic brain injury; OEF, Operation Enduring Freedom; OIF, Operation Iraqi Freedom; CAPS, Clinician Administered PTSD Scale; PSQI, Pittsburgh Sleep Quality Index; PSQI 3-factor structure, The PSQI subscales sleep efficiency, perceived sleep quality & daily disturbances refer to the Pittsburgh Sleep Quality Index 3-Factor structure. All ANCOVA's were corrected for age.

Supplementary Table S2. Association between PTSD symptom severity and sleep quality

|                         |                         | PTSD       |      |       |       | mTBI       |      |       |       | Comorbid PTSD+mTBI |      |       |       | No history of PTSD or mTBI |      |       |       |
|-------------------------|-------------------------|------------|------|-------|-------|------------|------|-------|-------|--------------------|------|-------|-------|----------------------------|------|-------|-------|
|                         |                         | Regression |      |       |       | Regression |      |       |       | Regression         |      |       |       | Regression                 |      |       |       |
| DV                      | IV                      | $\beta$    | $t$  | $f^2$ | $p^*$ | $\beta$    | $t$  | $f^2$ | $p^*$ | $\beta$            | $t$  | $f^2$ | $p^*$ | $\beta$                    | $t$  | $f^2$ | $p^*$ |
| PSQI Global             | Total CAPS              | .49        | 3.40 | .32   | .002  | .62        | 3.68 | .61   | .001  | .53                | 5.82 | .38   | <.001 | -.15                       | -.64 | .02   | .531  |
| PSQI 3-factor structure | Sleep efficiency        | Total CAPS | .32  | 2.07  | .11   | .046       | .51  | 2.79  | .36   | .011               | .22  | 2.17  | .05   | .033                       |      |       |       |
|                         | Perceived sleep quality | Total CAPS | .45  | 2.99  | .25   | .005       | .40  | 2.03  | .18   | .055               | .51  | 5.55  | .34   | <.001                      |      |       |       |
|                         | Daily disturbances      | Total CAPS | -.48 | 3.25  | .30   | .003       | .47  | 2.57  | .29   | .018               | .55  | 6.16  | .42   | <.001                      |      |       |       |

Note. PTSD, Post-traumatic stress disorder; mTBI, Mild traumatic brain injury; DV, Dependent variable; IV, Independent variable;  $\beta$ , Standardized beta coefficient;  $f^2$ , effect size; CAPS, Clinician Administered PTSD Scale; PSQI, Pittsburgh Sleep Quality Index; The PSQI subscales sleep efficiency, perceived sleep quality & daily disturbances refer to the Pittsburgh Sleep Quality Index 3-Factor Structure.  $p^*$  corrected for multiple comparisons as outlined in Figure 1.

**Supplementary Table S3.** Association between sleep quality and white matter FA<sub>T</sub>

|                             |             | PTSD       |          | mTBI       |             | Comorbid PTSD+mTBI |                 | No history of PTSD or mTBI |             |
|-----------------------------|-------------|------------|----------|------------|-------------|--------------------|-----------------|----------------------------|-------------|
| DV                          | IV          | Regression |          | Regression |             | Regression         |                 | Regression                 |             |
| Right FA <sub>T</sub>       | PSQI Global | <i>t</i>   | <i>p</i> | <i>t</i>   | <i>p</i>    | <i>t</i>           | <i>p</i>        | <i>t</i>                   | <i>p</i>    |
| AF                          |             | .09        | .926     | -.26       | .797        | -.25               | .803            | -.43                       | .669        |
| CB                          |             | .845       | .404     | -.70       | .491        | -3.56              | <b>&lt;.001</b> | -1.35                      | 1.92        |
| ILF                         |             | .984       | .332     | -2.51      | <b>.020</b> | -2.04              | <b>.044</b>     | -.62                       | .542        |
| IOFF                        |             | .543       | .590     | .65        | .525        | -2.87              | <b>.005</b>     | -.75                       | .465        |
| MdLF                        |             | -.47       | .643     | -1.05      | .307        | -2.14              | <b>.035</b>     | -1.88                      | .074        |
| SLF-I                       |             | 1.33       | .192     | -1.23      | .230        | -2.49              | <b>.015</b>     | -.25                       | .806        |
| SLF-II                      |             | .284       | .805     | -.72       | .481        | -1.31              | .195            | -1.25                      | .277        |
| SLF-III                     |             | .034       | .973     | -1.39      | .178        | -1.01              | .318            | -.15                       | .884        |
| UF                          |             | .126       | .900     | -.83       | .418        | -1.33              | .188            | -.43                       | .674        |
| Left FA <sub>T</sub>        | PSQI Global |            |          |            |             |                    |                 |                            |             |
| AF                          |             | 1.00       | .323     | -.04       | .968        | -1.03              | .307            | -1.77                      | .092        |
| CB                          |             | -.25       | .806     | .59        | .561        | -1.963             | .053            | -1.46                      | .160        |
| ILF                         |             | .678       | .502     | .77        | .446        | -2.72              | <b>.008</b>     | -2.56                      | <b>.019</b> |
| IOFF                        |             | .816       | .420     | -.94       | .355        | -3.53              | <b>&lt;.001</b> | -1.16                      | .260        |
| MdLF                        |             | .167       | .868     | -1.44      | .164        | -3.08              | <b>.003</b>     | -1.79                      | .089        |
| SLF-I                       |             | -.21       | .832     | -.47       | .644        | -2.42              | <b>.017</b>     | -1.49                      | .151        |
| SLF-II                      |             | .21        | .835     | 1.03       | .315        | -2.35              | <b>.021</b>     | -.812                      | .426        |
| SLF-III                     |             | .61        | .545     | -.02       | .984        | -2.55              | <b>.012</b>     | -1.00                      | .336        |
| UF                          |             | .43        | .674     | -.838      | .411        | -2.15              | <b>.035</b>     | -1.38                      | .892        |
| Commissural FA <sub>T</sub> | PSQI Global |            |          |            |             |                    |                 |                            |             |
| CC-I                        |             | -1.12      | .272     | -.25       | .028        | -3.61              | <b>&lt;.001</b> | -.97                       | .343        |
| CC-II                       |             | -.67       | .506     | -190       | .071        | -2.41              | <b>.018</b>     | -1.03                      | .314        |
| CC-III                      |             | -.44       | .661     | -.97       | .344        | -2.14              | <b>.035</b>     | -1.77                      | .092        |
| CC-IV                       |             | 1.52       | .139     | -.86       | .399        | -2.52              | <b>.013</b>     | -.42                       | .680        |
| CC-V                        |             | 1.38       | .176     | -.16       | .871        | -2.09              | <b>.040</b>     | -.64                       | .531        |
| CC-VI                       |             | .10        | .918     | -225       | 8.24        | -1.33              | .189            | -.48                       | .635        |
| CC-VII                      |             | -.07       | .944     | -.75       | .461        | .23                | .819            | -.62                       | .543        |

*Note.* PTSD, Post-traumatic stress disorder; mTBI, Mild traumatic brain injury; DV, Dependent variable; IV, Independent variable; FA<sub>T</sub>, Fractional anisotropy Tissue; PSQI, Pittsburgh Sleep Quality Index; AF, Arcuate fasciculus, CB, Cingulum bundle; ILF; Inferior longitudinal fasciculus; IOFF, Inferior occipito-frontal fasciculus; MdLF, Middle longitudinal fasciculus; SLF, Superior longitudinal fasciculus; UF, Uncinate fasciculus; CC, Corpus callosum.

**Supplementary Table S4.** Association between sleep quality and whole-brain FA<sub>T</sub>

|                             |                              | PTSD       |     |       |       | mTBI       |      |       |       | Comorbid PTSD+mTBI |       |       |       | No history of PTSD or mTBI |       |       |       |
|-----------------------------|------------------------------|------------|-----|-------|-------|------------|------|-------|-------|--------------------|-------|-------|-------|----------------------------|-------|-------|-------|
|                             |                              | Regression |     |       |       | Regression |      |       |       | Regression         |       |       |       | Regression                 |       |       |       |
| DV                          | IV                           | $\beta$    | $t$ | $f^2$ | $p^*$ | $\beta$    | $t$  | $f^2$ | $p^*$ | $\beta$            | $t$   | $f^2$ | $p^*$ | $\beta$                    | $t$   | $f^2$ | $p^*$ |
| Whole-Brain FA <sub>T</sub> | PSQI Global                  | .06        | .35 | .00   | .727  | -.15       | -.80 | .02   | .434  | -.39               | -4.04 | .18   | <.001 | -.25                       | -1.21 | .07   | .241  |
|                             | PSQI Sleep efficiency        |            |     |       |       |            |      |       |       | .10                | 1.02  | .01   | .309  |                            |       |       |       |
|                             | PSQI Perceived sleep quality |            |     |       |       |            |      |       |       | -.43               | -3.86 | .21   | <.001 |                            |       |       |       |
|                             | PSQI Daily disturbances      |            |     |       |       |            |      |       |       | -.15               | -1.46 | .09   | .149  |                            |       |       |       |

*Note.* PTSD, Post-traumatic stress disorder; mTBI, Mild traumatic brain injury; DV, Dependent variable; IV, Independent variable;  $\beta$ , Standardized beta coefficient;  $f^2$ , effect size; FA<sub>T</sub>, Fractional anisotropy Tissue; PSQI, Pittsburgh Sleep Quality Index; The PSQI subscales sleep efficiency, perceived sleep quality & daily disturbances refer to the Pittsburgh Sleep Quality Index 3-Factor Structure.  $p^*$  corrected for multiple comparisons as outlined in Figure 1.

**Supplementary Figures**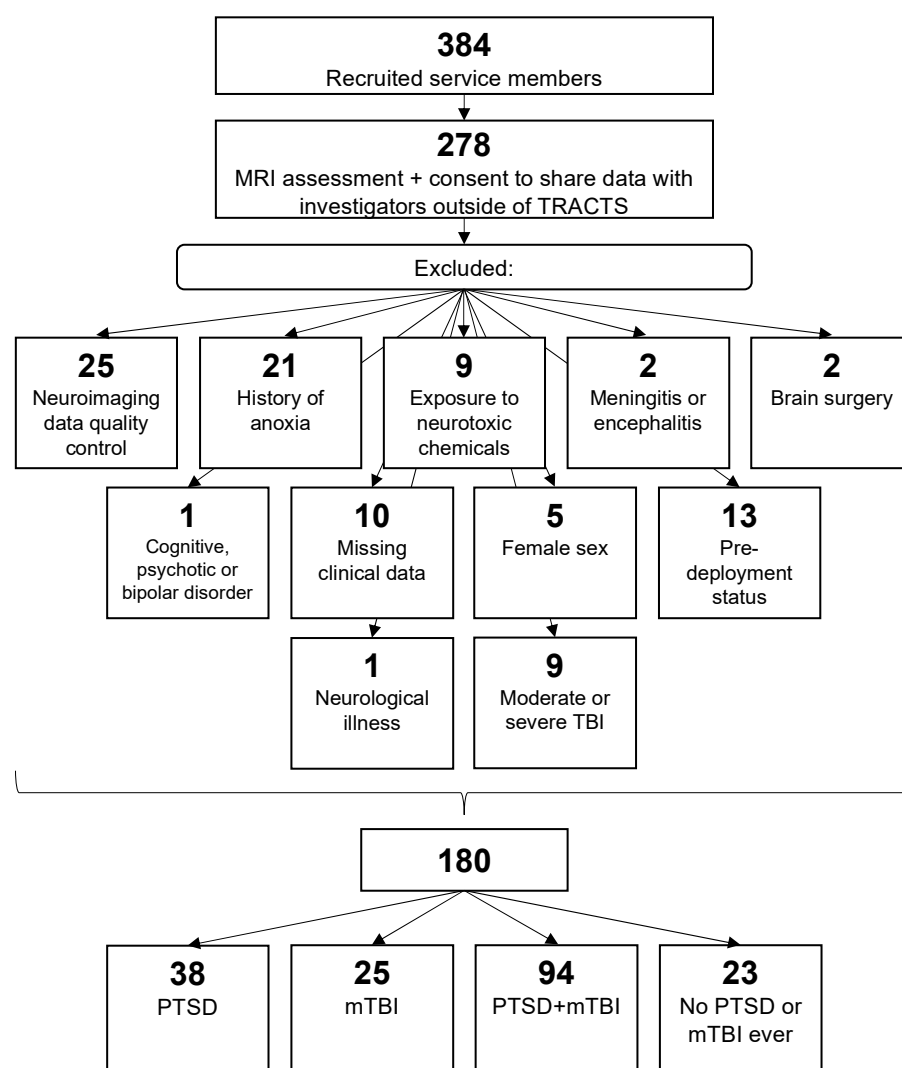**Supplementary Figure S1.** Excluded participants and final sample sizes

*Note.* MRI, Magnetic resonance imaging; TRACTS, Translational Research Center for TBI and Stress Disorders; PTSD, Post-traumatic stress disorder; mTBI, Mild traumatic brain injury.

This figure shows the number of excluded participants and the number of the total sample ( $N = 180$ ), and sub-samples (PTSD,  $n = 38$ ; mTBI,  $n = 25$ ; comorbid PTSD+mTBI,  $n = 94$ ; No history of PTSD or mTBI,  $n = 23$ ).

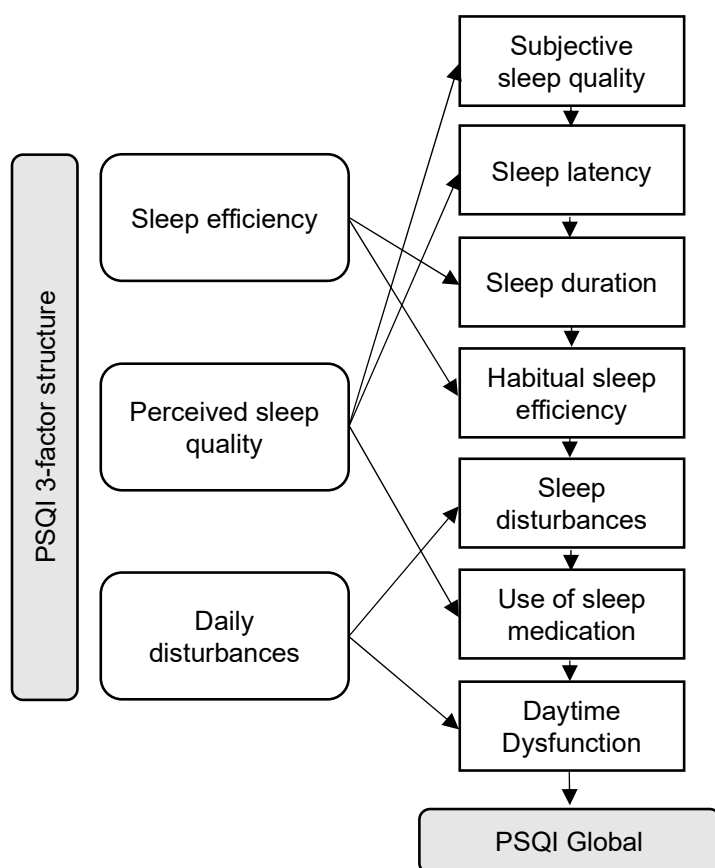

**Supplementary Figure S2.** Assessment of sleep quality

*Note.* PSQI, Pittsburgh Sleep Quality Index; PSQI 3-factor structure, The PSQI subscales sleep efficiency, perceived sleep quality & daily disturbances refer to the Pittsburgh Sleep Quality Index 3-Factor Structure.

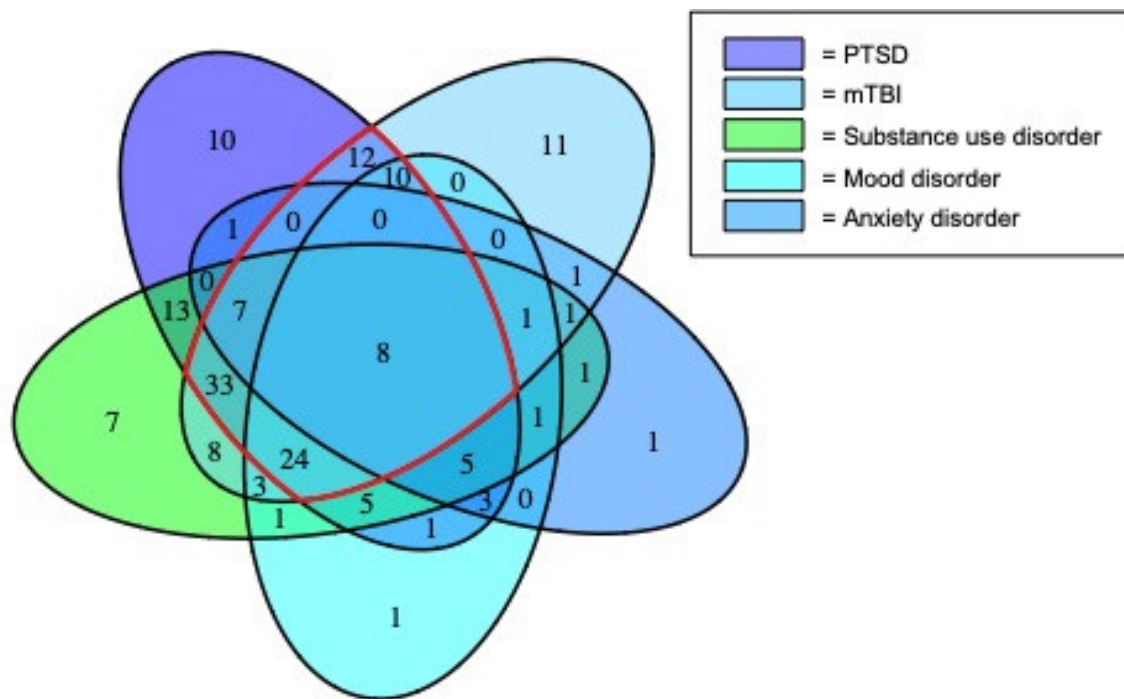

### Supplementary Figure S3. Overlap of diagnoses

*Note.* PTSD, Post-traumatic stress disorder; mTBI, Mild traumatic brain injury. The red-lined area pictures the comorbid PTSD+mTBI sample ( $n = 94$ ) with overlapping substance use, mood and anxiety disorder.

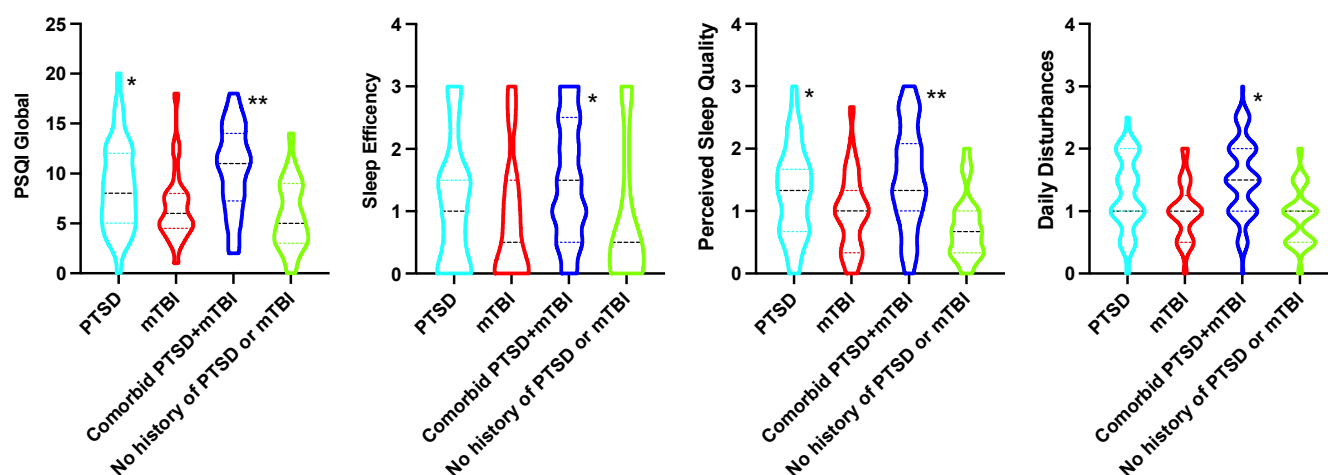

#### Supplementary Figure S4. Sleep quality group comparisons

*Note.* PTSD, Post-traumatic stress disorder; mTBI, Mild traumatic brain injury; PSQI,

Pittsburgh Sleep Quality Index; The PSQI subscales sleep efficiency, perceived sleep quality & daily disturbances refer to the Pittsburgh Sleep Quality Index 3-Factor structure.

This figure illustrates the significant difference in sleep quality between participants (PTSD vs. mTBI vs. comorbid PTSD+mTBI vs. no history of PTSD or mTBI). Lower scores on the PSQI subscales represent better sleep quality.

PSQI Global: \* Significantly higher than no history of PTSD or mTBI. \*\* Significantly higher than mTBI and no history of PTSD or mTBI.

PSQI Sleep efficiency: \* Significantly higher than mTBI and no history of PTSD or mTBI.

PSQI Perceived sleep quality: \* Significantly higher than no history of PTSD or mTBI. \*\* Significantly higher than mTBI and no history of PTSD or mTBI

PSQI Daily disturbances: \* Significantly higher than mTBI and no history of PTSD or mTBI.

All analyses are corrected for multiple comparisons as outlined in Figure 1.
